# Supplementary material for: Association between elevated glycosylated hemoglobin and cognitive impairment in older Korean adults: 2009–2010 Ansan cohort of the Korean genome and epidemiology study
Source: PubMed Central journal article supplement (PMC11586203; doi:10.3389/fpubh.2024.1417236), 2024-11-11
Supplement: Data_Sheet_1.pdf [file Data_Sheet_1.pdf]

# Association between Elevated Glycosylated Hemoglobin and Cognitive Impairment in Older Korean Adults: 2009–2010 Ansan Cohort of the Korean Genome and Epidemiology Study

## *Supplementary Material*

### Appendix 1

**Supplementary Table 1. Means and standard deviations of MMSE and MoCA domains**

| Domains                             | Points | Mean  | SD   | Scaled score |
|-------------------------------------|--------|-------|------|--------------|
| MMSE (N = 849)                      |        |       |      |              |
| Orientation in time                 | 5      | 4.88  | 0.44 | 97.6         |
| Orientation in place                | 5      | 4.90  | 0.34 | 98.0         |
| Registration                        | 3      | 2.96  | 0.31 | 98.7         |
| Attention and calculation           | 5      | 3.96  | 1.29 | 79.2         |
| Recall                              | 3      | 1.49  | 1.09 | 49.7         |
| Oral and written language ability   | 8      | 7.31  | 0.98 | 91.4         |
| Visuospatial function               | 1      | 0.84  | 0.37 | 84.0         |
| Total                               | 30     | 26.34 | 2.75 | 87.8         |
| MoCA (N = 839)                      |        |       |      |              |
| Visuospatial and executive function | 5      | 3.78  | 1.24 | 75.6         |
| Naming                              | 3      | 2.70  | 0.62 | 90.0         |
| Attention and calculation           | 6      | 4.92  | 1.31 | 82.0         |
| Language                            | 3      | 2.08  | 0.89 | 69.3         |
| Abstraction                         | 2      | 0.63  | 0.76 | 31.5         |
| Delayed recall                      | 5      | 2.06  | 1.54 | 41.2         |
| Orientation in time and place       | 6      | 5.87  | 0.46 | 97.8         |
| Total                               | 30     | 22.37 | 4.11 | 74.6         |

MMSE, Mini-Mental State Examination; MoCA, Montreal Cognitive Assessment; SD, standard deviation

## Appendix 2

**Supplementary Table 2. Dispersion of continuous independent variables**

| Variables                   | N   | Mean (SD)    | Minimum | Q1    | Median | Q3    | Maximum | Range | IQR  |
|-----------------------------|-----|--------------|---------|-------|--------|-------|---------|-------|------|
| Age (years)                 | 853 | 66.4 (4.7)   | 59      | 62    | 66     | 70    | 77      | 18    | 8    |
| BMI (kg/m <sup>2</sup> )    | 852 | 24.8 (3.0)   | 16.1    | 22.9  | 24.7   | 26.6  | 34.8    | 18.7  | 3.7  |
| SBP (mmHg)                  | 846 | 120.0 (16.2) | 80      | 110.0 | 119.0  | 130.0 | 212.0   | 132.0 | 20.0 |
| DBP (mmHg)                  | 846 | 74.6 (9.0)   | 50      | 68.0  | 74.0   | 80.0  | 108.0   | 58.0  | 12.0 |
| Muscle mass (kg)            | 852 | 42.7 (7.5)   | 25.8    | 36.7  | 41.5   | 48.4  | 66.3    | 40.5  | 11.7 |
| HbA1c (%)                   | 853 | 5.9 (0.9)    | 3.7     | 5.5   | 5.7    | 6.1   | 12.0    | 8.3   | 0.6  |
| FBG (mg/dL)                 | 853 | 103.5 (31.1) | 50      | 90.0  | 96.0   | 105.0 | 415.0   | 365.0 | 15.0 |
| Insulin ( $\mu$ IU/mL)      | 853 | 10.6 (16.4)  | 1.0     | 6.4   | 8.3    | 11.1  | 349.0   | 348.0 | 4.7  |
| Hemoglobin (g/dL)           | 853 | 13.7 (1.3)   | 8.1     | 12.7  | 13.6   | 14.6  | 17.7    | 9.6   | 1.9  |
| TC (mg/dL)                  | 853 | 197.6 (38.1) | 79      | 171.0 | 197.0  | 222.0 | 337.0   | 258.0 | 51.0 |
| HDL-C (mg/dL)               | 853 | 44.2 (10.9)  | 24      | 37.0  | 42.0   | 50.0  | 82.0    | 58.0  | 13.0 |
| TG (mg/dL)                  | 853 | 139.3 (74.3) | 32      | 87.0  | 121.0  | 169.0 | 604.0   | 572.0 | 82.0 |
| Homocysteine ( $\mu$ mol/L) | 853 | 14.8 (5.3)   | 6.5     | 11.6  | 13.8   | 16.5  | 65.0    | 58.5  | 4.9  |
| MMSE score                  | 849 | 26.3 (2.8)   | 13      | 25.0  | 27.0   | 28.0  | 30.0    | 17.0  | 3.0  |
| MoCA score                  | 839 | 22.4 (4.1)   | 6       | 20.0  | 23.0   | 25.0  | 30.0    | 24.0  | 5.0  |

Q1, 25th percentile; Q3, 75th percentile; IQR, interquartile range; MMSE, Mini-Mental State Examination; MoCA, Montreal Cognitive Assessment; BMI, body mass index; SBP, systolic blood pressure; DBP, diastolic blood pressure; HbA1c, hemoglobin A1c; FBG, fasting blood glucose; Hb, hemoglobin; TC, total cholesterol; HDL-C, high-density lipoprotein cholesterol; TG, triglycerides

Appendix 3

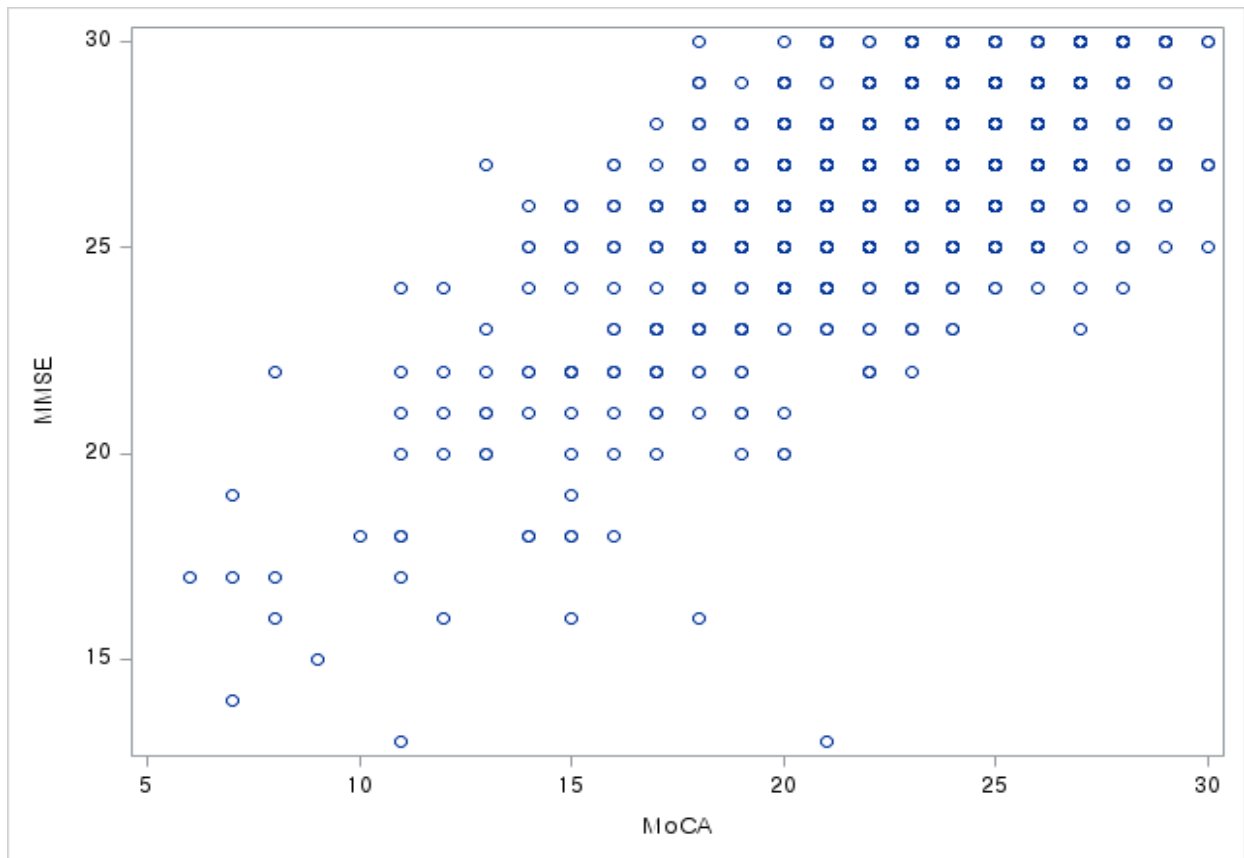

Supplementary Figure 1. The correlation between the Montreal Cognitive Assessment (MoCA) and Mini-Mental State Examination (MMSE) total scores in older Korean adults without dementia
